# Supplementary material for: Structural insights into pre-pore intermediates of alpha-hemolysin in the lipidic environment
Source: Research Square preprint supplement (doi:10.21203/rs.3.rs-4557951/v1), 2025-03-25
Supplement: Supplementary file 2 [file 465158d1026fe22c5aac6930.pdf]

# **Structural insights into pre-pore intermediates of alpha-hemolysin in the lipidic environment**

Arnab Chatterjee<sup>1§</sup>, Anupam Roy<sup>1§</sup>, Thejas Satheesh<sup>2</sup>, Partho Pratim Das<sup>1</sup>, Bapan Mondal<sup>1</sup>, Prithiv Kishore<sup>1</sup>, Mahipal Ganji<sup>2</sup>, Somnath Dutta<sup>1#</sup>

<sup>1</sup>Molecular Biophysics Unit, Indian Institute of Science, Bengaluru, India

<sup>2</sup>Department of Biochemistry, Indian Institute of Science, Bengaluru, India

<sup>3</sup>Department of Bioengineering, Indian Institute of Science, Bengaluru, India

<sup>§</sup>Equally contributed.

<sup>#</sup>Corresponding Author: Somnath Dutta, [somnath@iisc.ac.in](mailto:somnath@iisc.ac.in)

## Supplemental Figures and Legends

**A. SDS-PAGE and SEC profile of  $\alpha$ -HL**

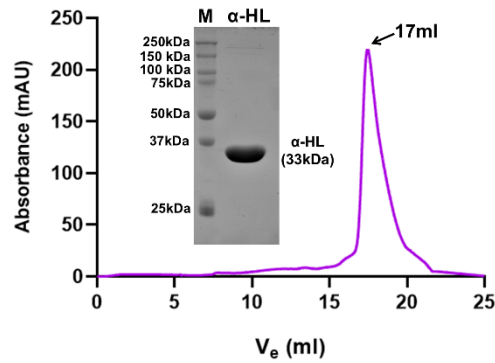

**B. MALDI spectra of monomeric  $\alpha$ -HL**

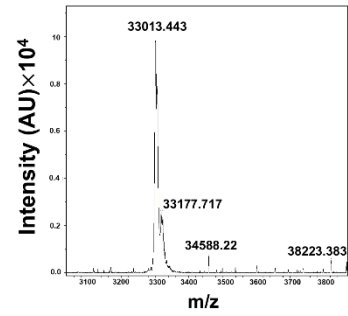

**C. Thermal profile of monomeric  $\alpha$ -HL**

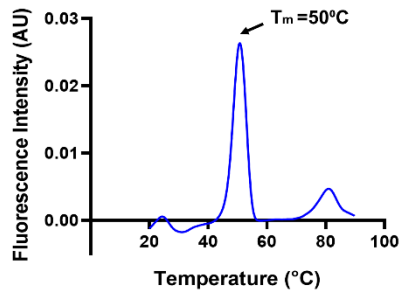

**D. SDS-PAGE of  $\alpha$ -HL with plasma membrane**

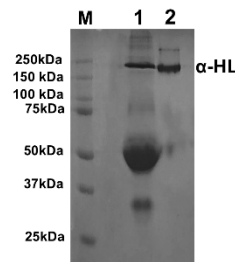

**E. Hemolytic assay**

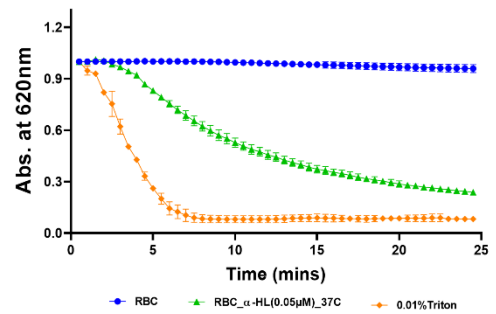

**Figure S1: Preliminary purification and characterization of  $\alpha$ -HL.**

**A.** SDS-PAGE of SEC purified  $\alpha$ -HL monomer. Size exclusion chromatography (Superdex<sup>TM</sup> S200 increase 10/300 GL) profile of recombinant  $\alpha$ -HL monomer. **B.** MALDI spectra analysis of recombinant  $\alpha$ -HL showed a molecular weight of intact protein of ~33 kDa. **C.** Thermal denaturation spectral profile of the monomeric toxin. **D.** SDS-PAGE profile of oligomeric protein contents presents in the supernatant fraction of  $\alpha$ -HL treated rabbit erythrocytes (lane-2). **E.** Hemolytic assay of rabbit erythrocytes (10%) was performed with purified monomeric  $\alpha$ -HL toxin (50 nM)

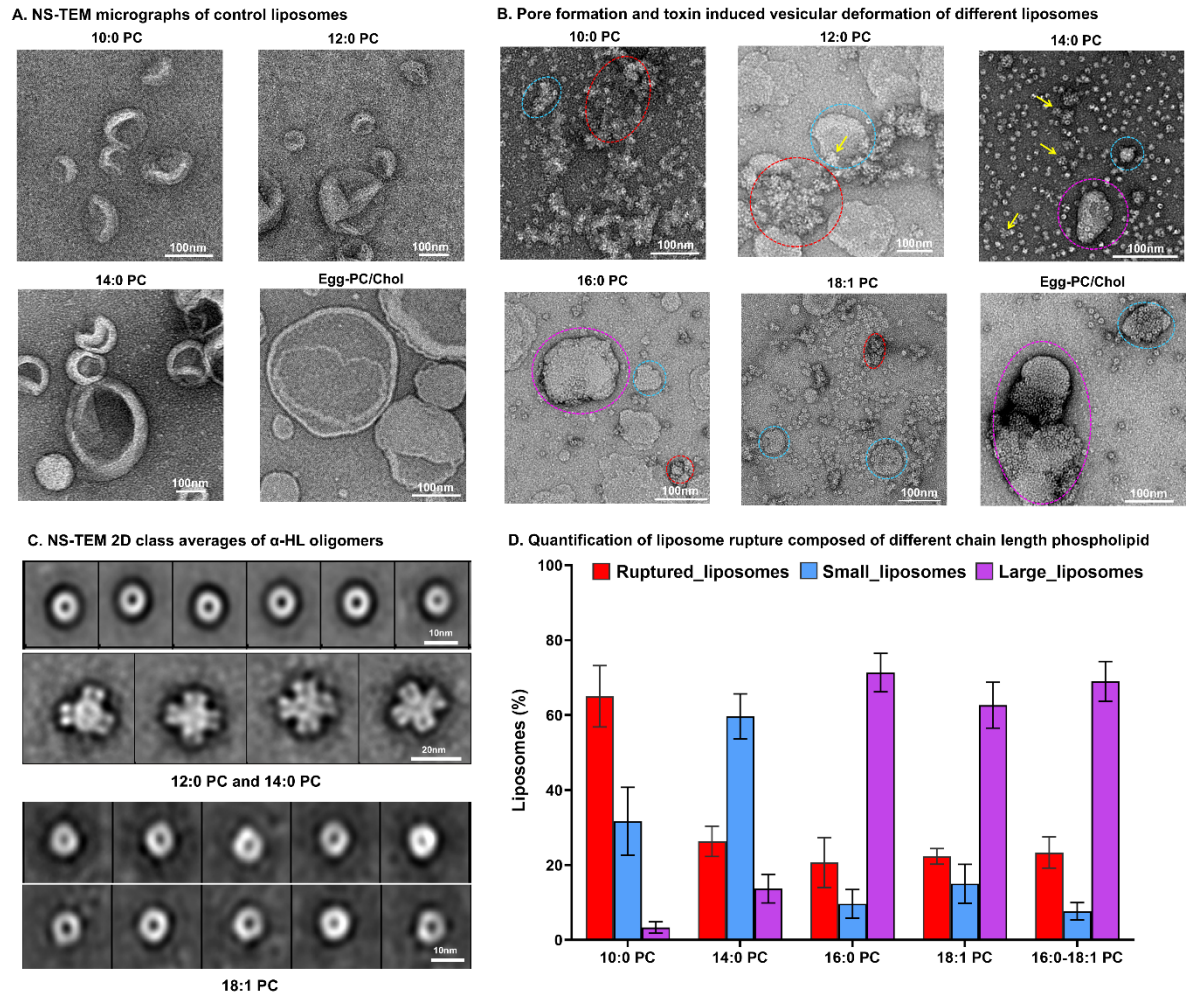

**Figure S2: Different modes of toxin ( $\alpha$ -HL) mediated lipid membrane re-modulations.**

**A.** NS-TEM micrographs of control liposomes (10:0, 12:0, 14:0, egg-PC/Chol). **B.** Change in liposome morphology of (10:0, 12:0, 14:0, 16:0, 18:1, and Egg-PC/Chol after toxin incubation shown encircled by cyan (large vesicles), violet (small lipid-protein cluster) and orange-red (ruptured lipid). Yellow arrow showed higher-order protein-lipid assembly. **C.** The representative NS-TEM 2D class averages of oligomeric states of  $\alpha$ -HL (12:0, 14:0, and 18:1 PCs) and higher ordered oligomeric species (12:0 and 14:0PC). **D.** Comparison of liposome morphologies after toxin incubation is represented in bar plot.



# Single molecule leakage assay of different lipid liposomes

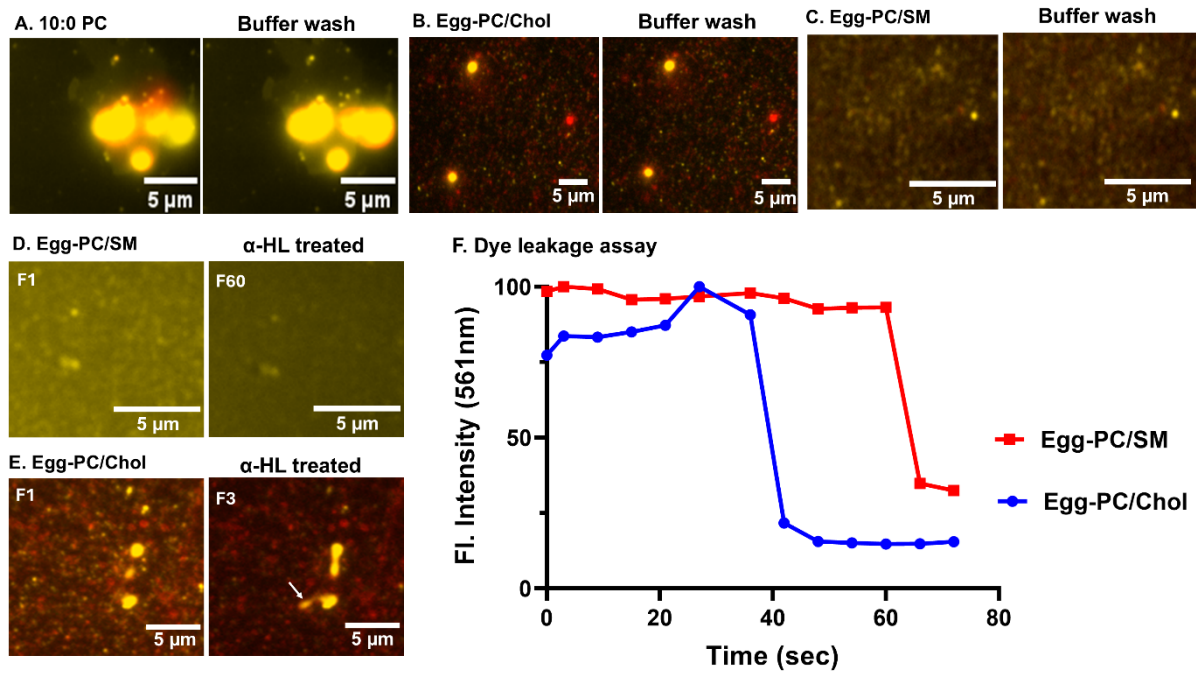

**Figure S3:  $\alpha$ -HL induced rhodamine leakage assay with different composites vesicles.**

**A-C.** The relative fluorescence intensities during Total Internal Reflection Fluorescence (TIRF) microscopic imaging for both fluorophores remained unchanged while washing with buffer through the flow-channel-bound liposomes (lipid in red color and encapsulated dye in yellow color). **D.** Toxin-treated NBD-PE labelled Egg PC/SM liposomes shown in pseudo color (red), filled with rhodamine (in yellow), showed a decrease in the fluorescence of Rhodamine dye. **E.** Protrusion of Egg-PC/Chol liposomes after  $\alpha$ -HL treatment (white arrow). **F.** Comparison of single-molecule based different composites vesicle encapsulated rhodamine leakage assay showed significant delays in the lag phase for their kinetics.

# A. Cryo-EM data processing pipeline of $\alpha$ -HL heptameric pore structure in 10:0 PC liposomes

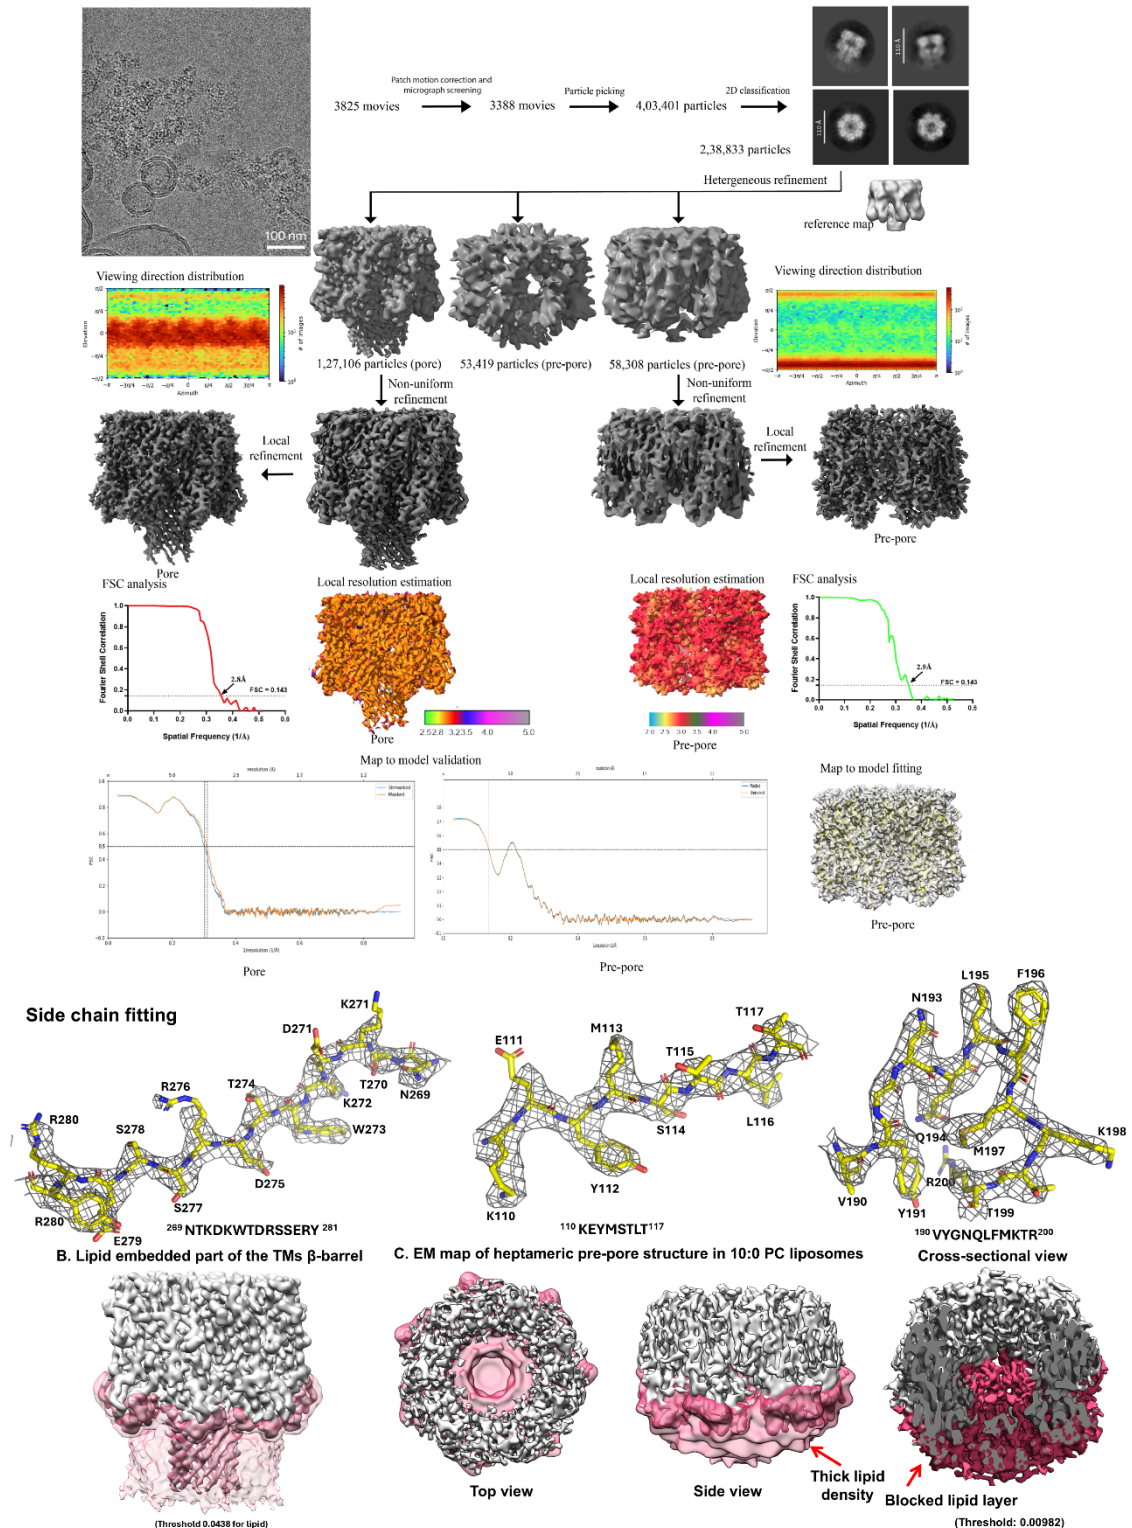

**Figure S4: Cryo-EM data processing pipeline and maps of oligomeric species formed in the presence of 10:0 PC liposomes.**

**A.** Cryo-EM data processing pipeline for the oligomeric states of  $\alpha$ -HL identified from 10:0 PC liposomes. Gold Standard FSC of heptameric pore and pre-pore cryo-EM map had a 2.8 Å and 2.9 Å global resolution respectively. An angular distribution and the local resolution distributions for both the cryo-EM maps of heptameric pore and pre-pore states were depicted. The electron density of the EM map was fitted with their respective atomic models (cartoon representations). Side chain fitting of residues is also shown. **B.** Lipid embedded part of pore structure is shown after low-pass filtering of

lipid densities. **C.** The top and bottom views of the heptameric pre-pore structure. A low-pass filtered thick lipid density (gray) completely blocked TMs pore vestibule.

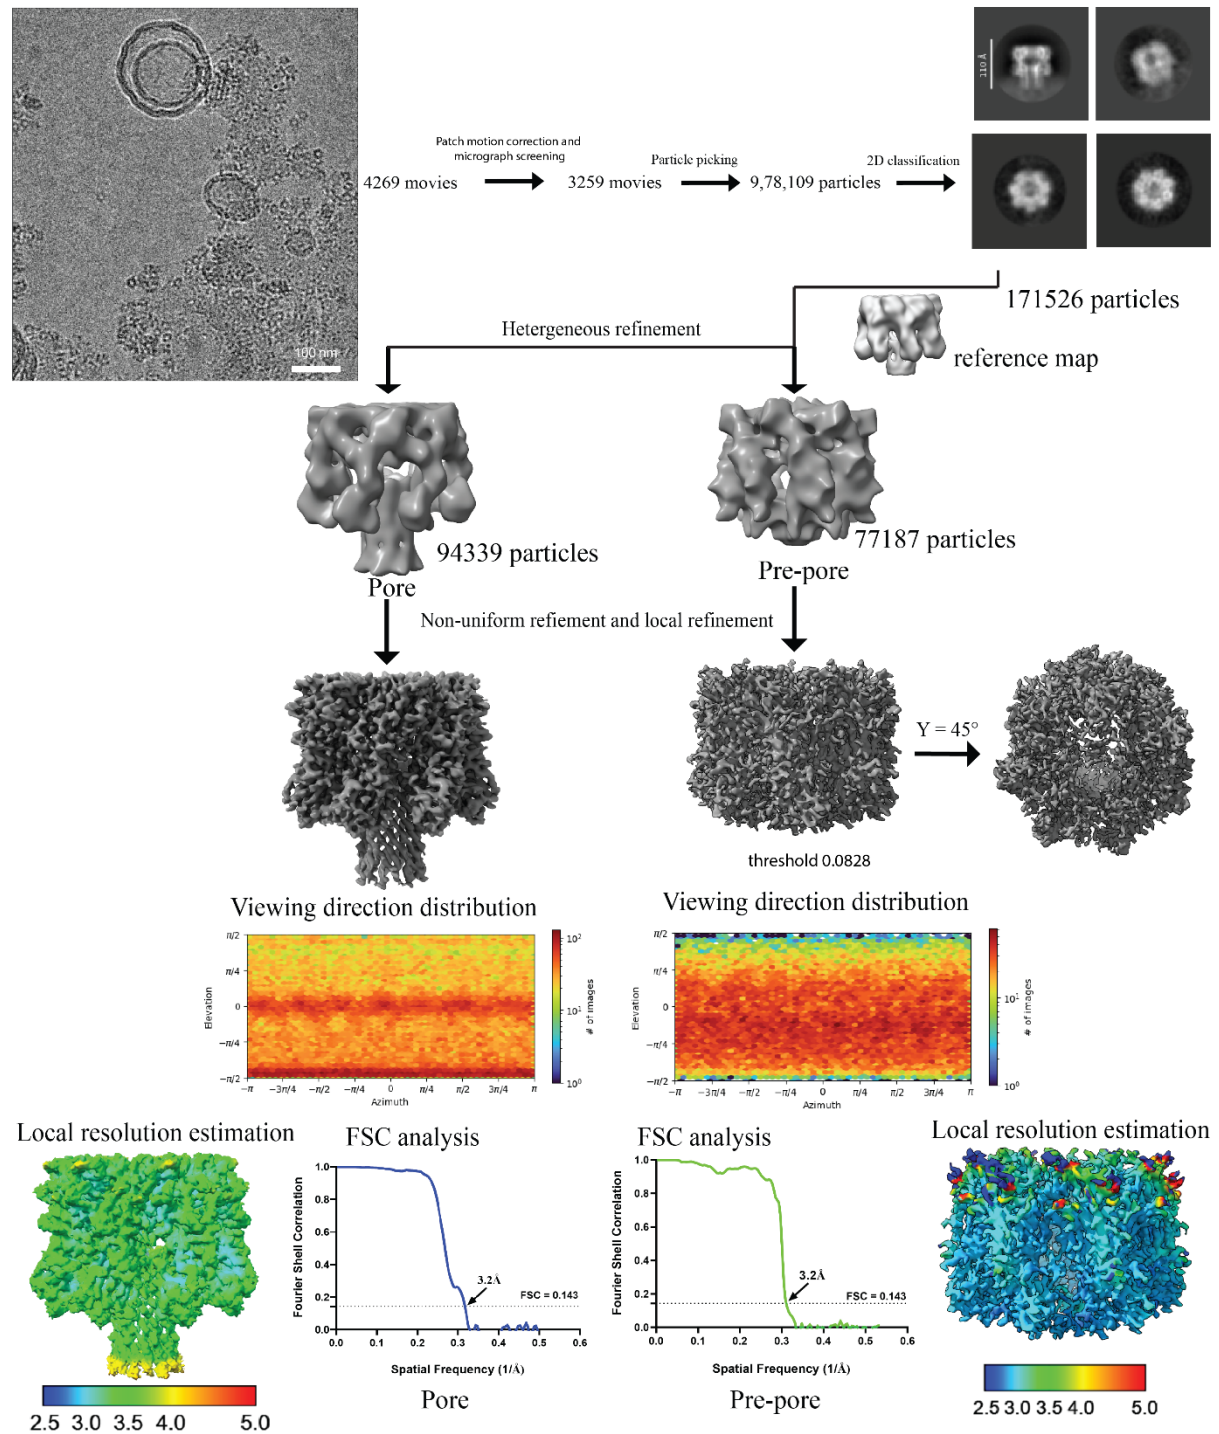

**Figure S5: Cryo-EM data processing pipeline of heptameric conformations derived from 12:0 PC liposomes.**



### A. Toxin mediated vesicle fusion and membrane protrusion

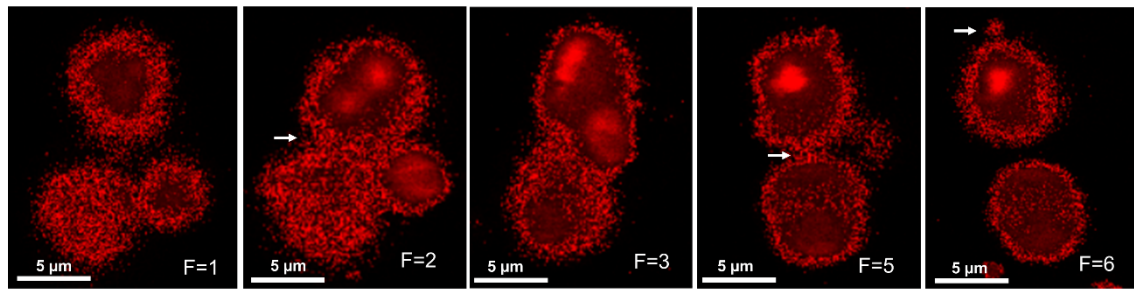

### B. Fluorescently labelled toxin promoted the damage of Egg-PC/Chol liposomes

TIRF image of Rhod-PE incorporated Egg-PC/Chol

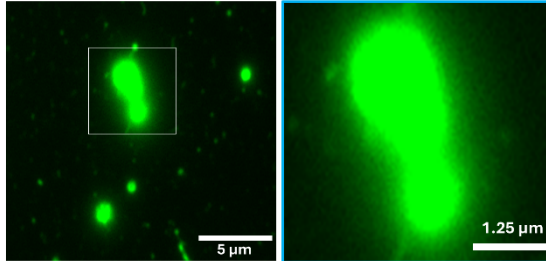

Enlarged view

Atto 647N labeled  $\alpha$ -HL treated with NBD labelled Egg-PC/Chol

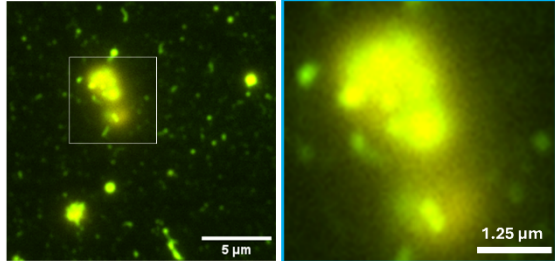

Enlarged view

### C. Cryo-EM data processing pipeline of $\alpha$ -HL heptameric pore structure in Egg-PC/Chol liposomes

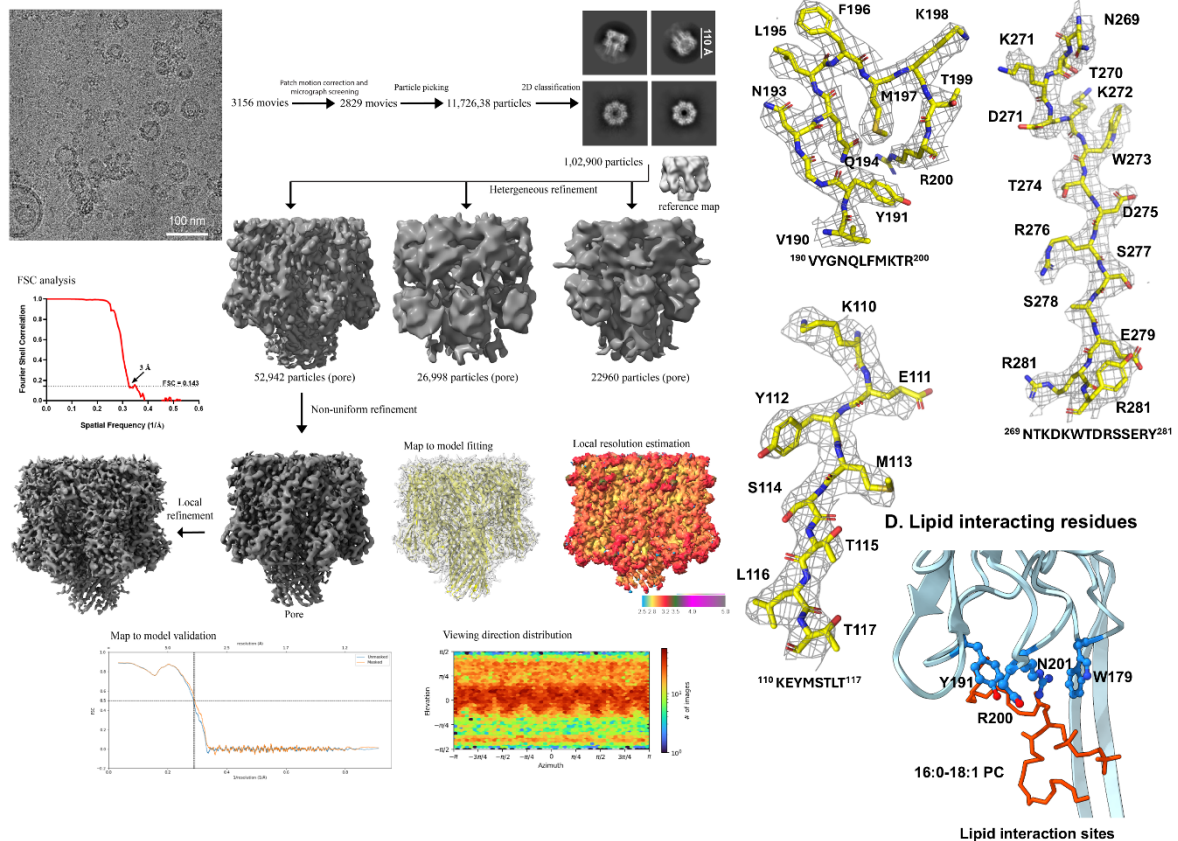

**Figure S6:** Impacts of toxin on composite lipid membranes and cryo-EM analysis of heptameric pore structure from Egg-PC/Chol liposomes.

**A.** Snapshots of different fates of liposomes after toxin treatment including vesicle-vesicle fusions and protrusion of lipid bodies (white arrows). **B.** TIRF image showing a pseudo green fluorescence of Rhod-PE tagged Egg-PC/Chol liposomes (left). Binding and co-localization of atto488 fluorescent-tagged 278C  $\alpha$ -HL ( $\lambda_{em}$  = 540 nm, yellow-colored) on Rhod-PE ( $\lambda_{em}$  = 580 nm) tagged Egg-PC/Chol liposome represented in an enlarged view (right). **C.** Cryo-EM data processing pipeline of  $\alpha$ -HL heptameric pore structure isolated from Egg-PC/Chol liposomes. **D.** Amino acids of the rim domain interacting with 16:0/18:1 lipid chain are shown ball and stick.

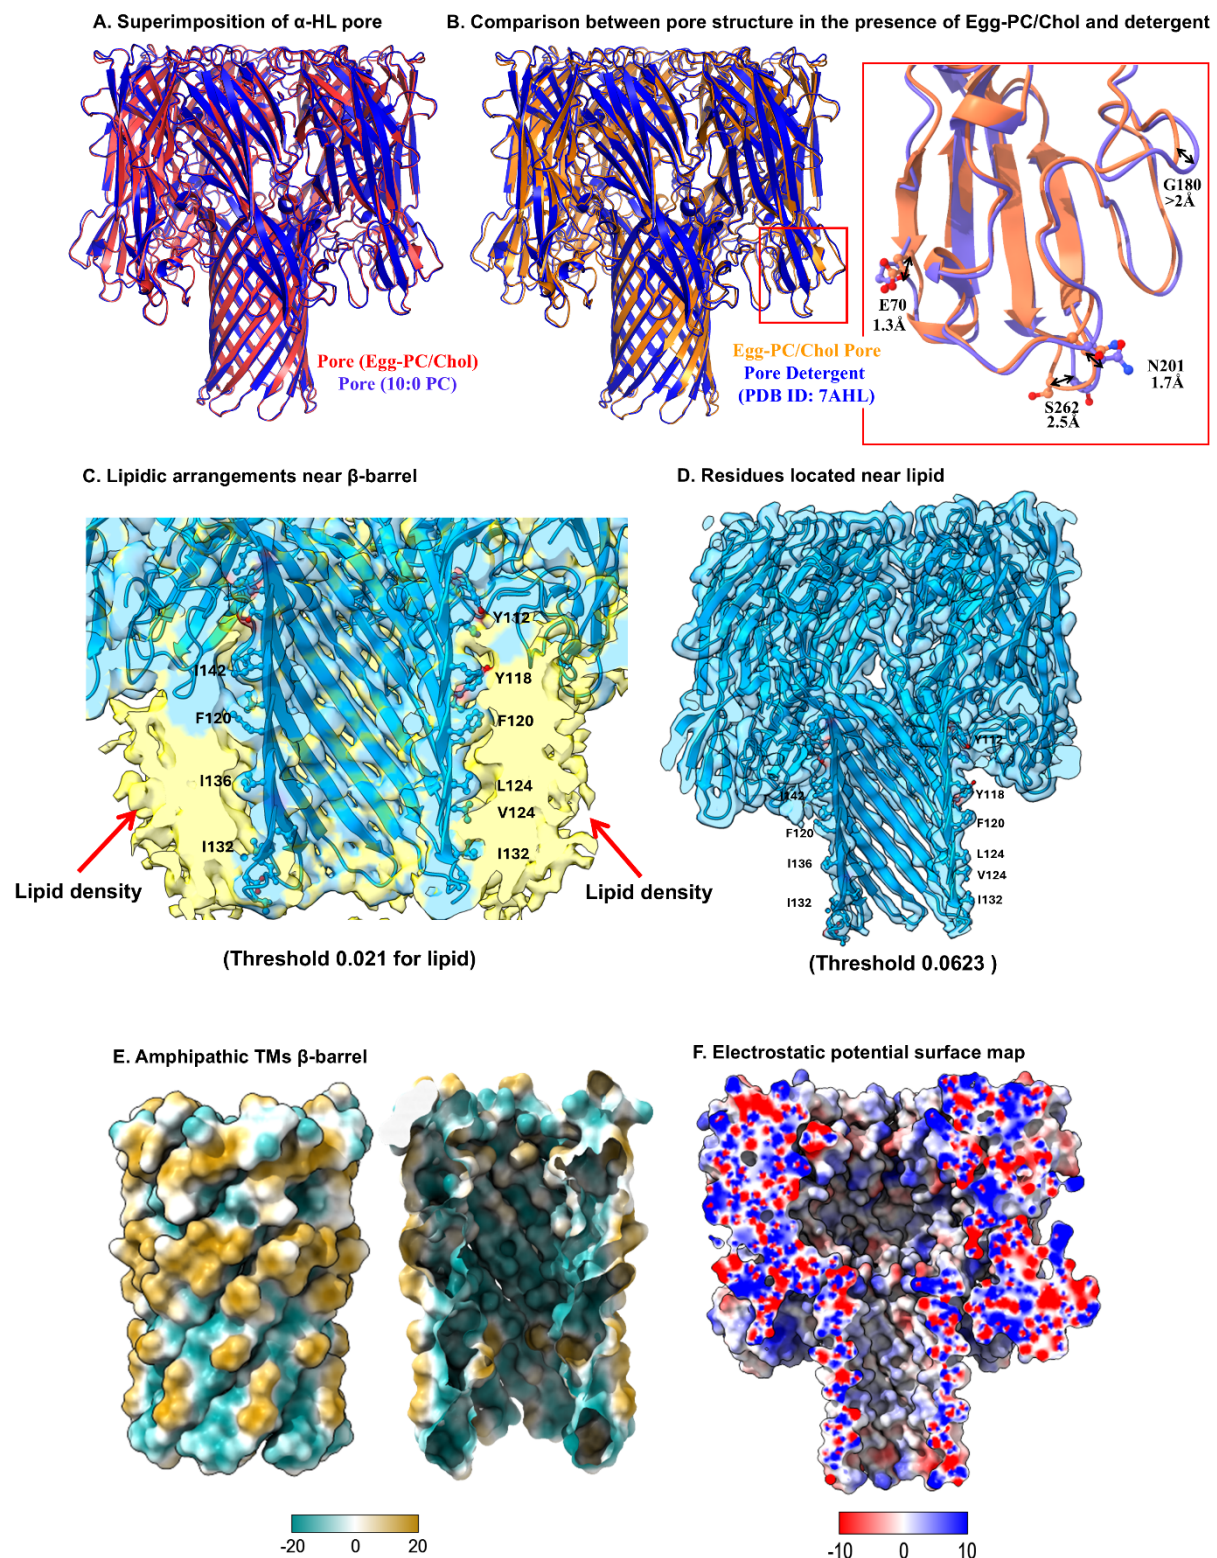

**Figure S7: Structural overviews of heptameric  $\alpha$ -HL pore conformation in different conditions and protein-membrane (lipid) interfaces.**

**A.** Structural superimposition of pore structure derived from egg PC/Chol and 10:0 PC lipid vesicles. **B.** Difference between detergent-derived and Egg PC/Chol-derived heptameric pore structure. **C.** Structural overview of extra lipid layer (yellow color) surrounding the transmembrane domain. **D.** The amphipathic aromatic residues Y112 (from  $\beta$ 6) and Y148, H144 (from  $\beta$ 7) located at upper TMs and hydrophobic residues L116, Y118, F120, and V140 located at upper TMs. **E.** The hydrophobic surface distribution of TMs pore predicted localization of hydrophobic side chain (golden) at upper TMs and polar residues (cyan) in lower TMs (left). While the cross-sectional of inner TMs pore was predominantly polar. Scale bar reflected the relative change in hydrophobic and polar distribution. Respective value in the bar showed the hydrophobicity index, where golden represents hydrophobic residues. **F.** Surface charge distribution of the inner cross-sectional part of the entire channel. Red color showing the negatively charged residues, while blue color showing positively charged residues.



### A. Increased rigidity in 10:0 PC/SM liposomes

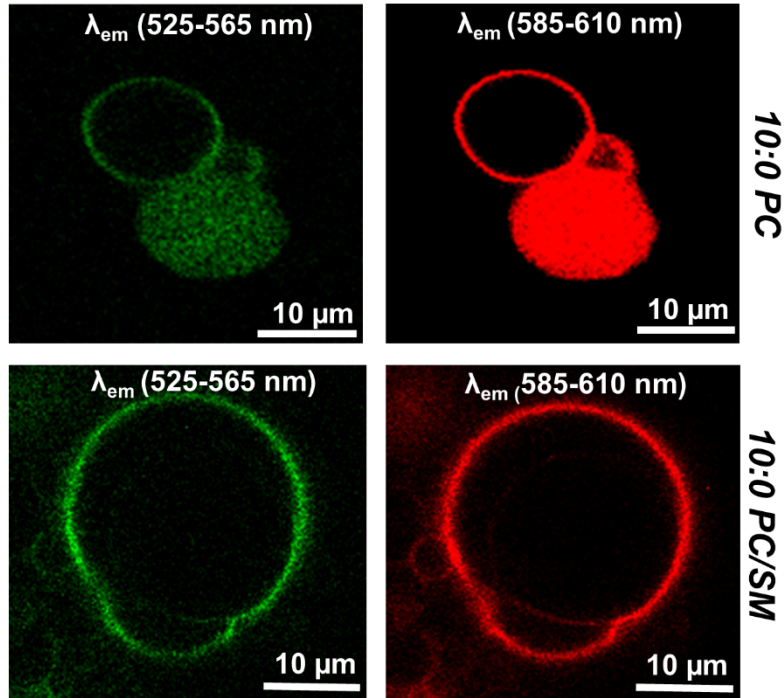

### B. Increased rigidity in Egg-PC/SM liposomes

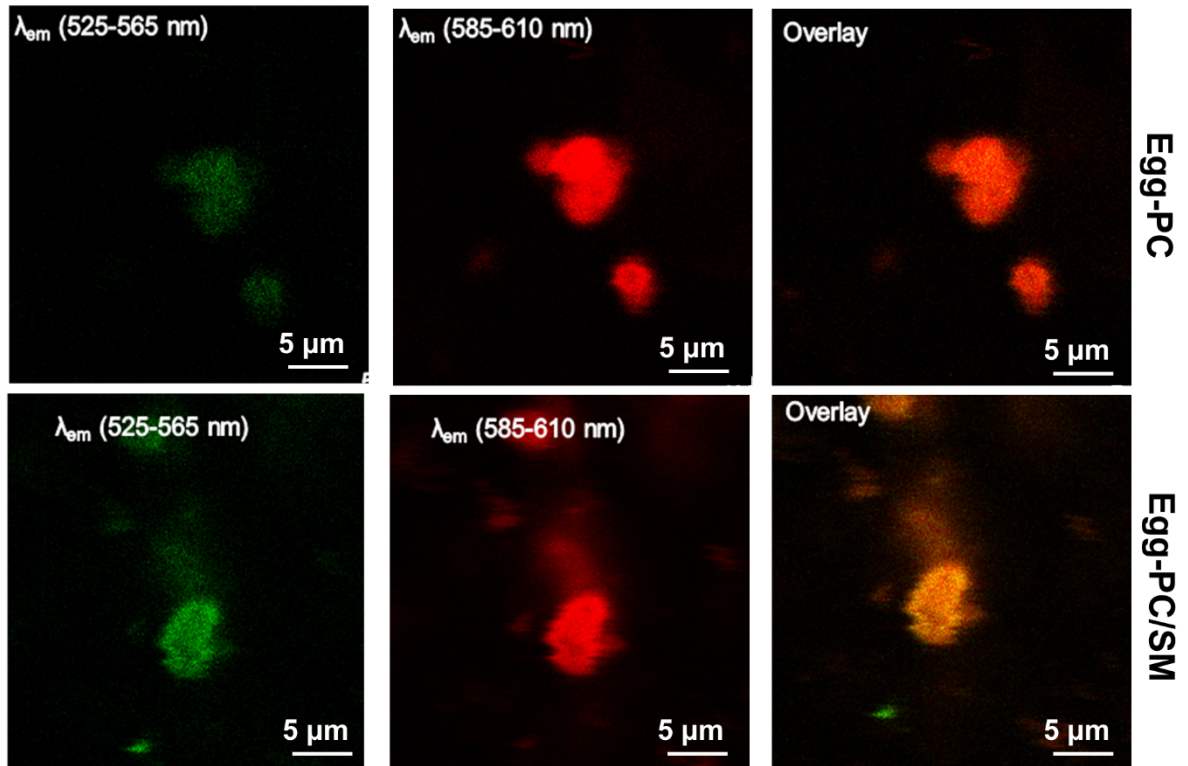

**Figure S8: Impact of sphingomyelin on membrane rigidity.**

**A.** Confocal images of 10:0 PC and 10:0-PC/SM in the presence of lipophilic membrane staining dye Nile red. **B.** Confocal images of Egg-PC and Egg-PC/SM in the presence of lipophilic membrane

staining dye Nile red. SM incorporated 10:0 PC, and Egg-PC showed a relatively higher emission intensity of Nile red at 525-565 nm (green color).

#### A. Cryo-EM data processing pipeline of $\alpha$ -HL heptameric pore and pre-pore structures in Egg-PC/SM liposomes

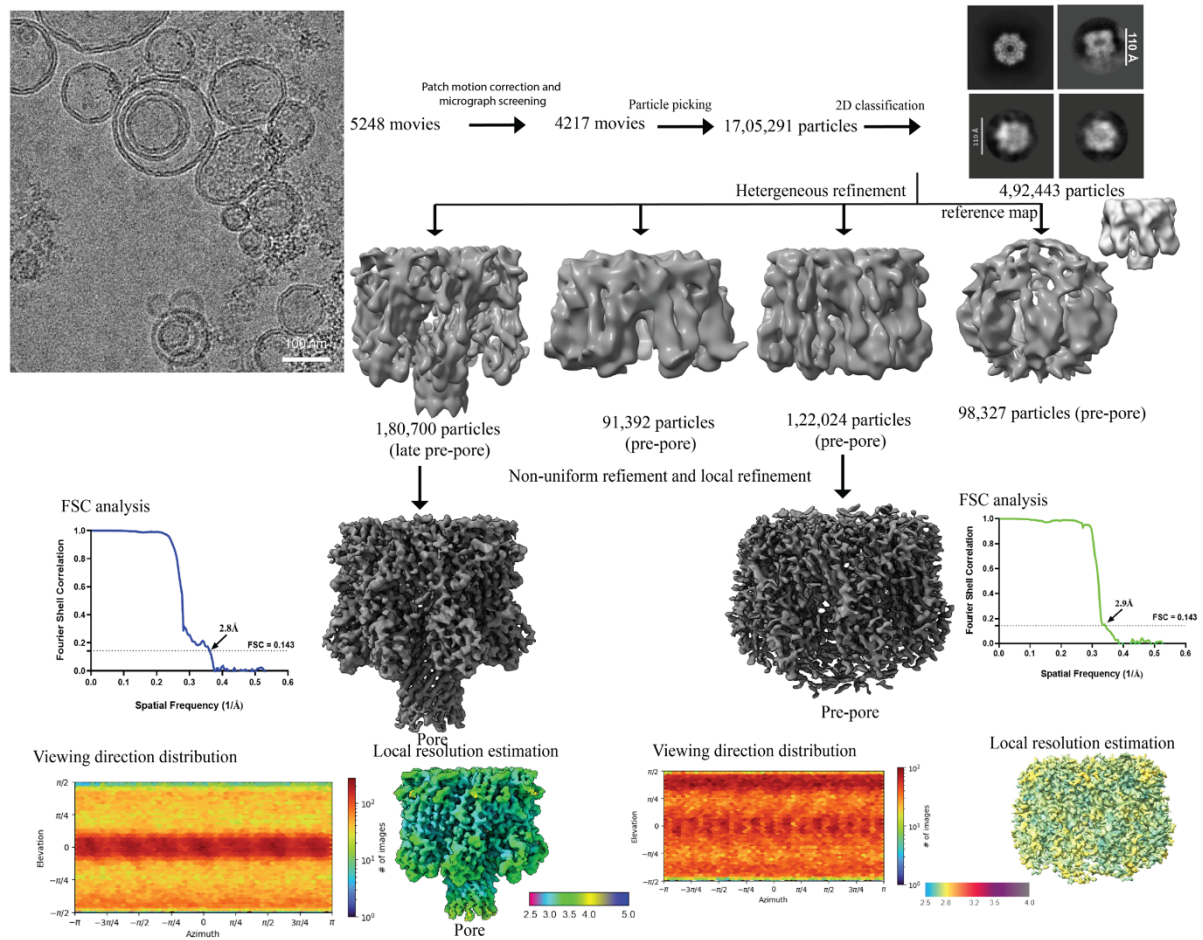

#### B. Lipid density located in upper and lower TMs

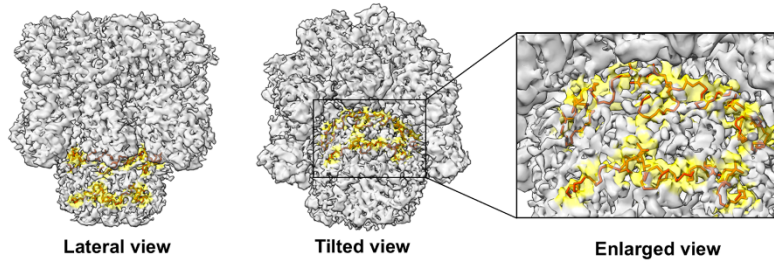

#### C. Lipid density fitting in upper TMs

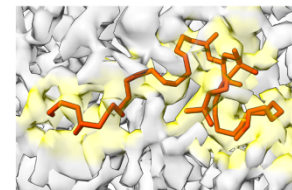

**Figure S9:** *A. Data processing pipeline of heptameric toxin derived from Egg-PC/SM liposomes. B. Location of lipid density at lower and upper TMs. C. Fitting of 16:0/18:1 lipid chain at the upper TMs.*



**A. Cryo-EM reconstruction workflow:** 3291 movies → Patch motion correction and micrograph screening → 2666 movies → Particle picking → 7,61,201 particles → 2D classification → 2,21,021 particles → Heterogeneous refinement → 32,642 particles (pore) / 55,831 particles (pre-pore) / 1,32,548 particles → Non-uniform refinement → Late pre-pore Map to model validation → Local refinement → Map to model fitting → Atomic model.

**B. Atomic model of late pre-pore species:** A 3D reconstruction of the late pre-pore species, showing the protein subunits in yellow and the lipid in blue. The model is shown in a side view, with a color scale for local resolution (2.0 to 5.0 Å).

**C. Lipid located at rim domain:** A detailed view of the lipid molecule (blue) located at the rim domain of the late pre-pore species, shown within the protein subunits (gray).

**D. Enlarged view:** An enlarged view of the lipid molecule (blue) and its interaction with the protein subunits (gray).

**E. Comparison between pore and late pre-pore structure:** A comparison of the pore and late pre-pore structures, showing the protein subunits in pink (pore) and yellow (late pre-pore). The lipid is shown in blue.

**A.** Cryo-EM data processing pipeline for the oligomeric late pre-pore states of  $\alpha$ -HL generated from 10:0 PC/SM liposomes. **B.** Atomic model of late pre-pore species. **C.** Lipid density located at the bottom of the rim domain. **D.** Enlarged of lipid location at rim and upper TMs. **E.** Map-to map comparison of 10:0 PC derived pore and 10:0 PC/SM derived late pre-pore with fitted atomic model Enlarged views showed density fitting at lower part of rim domain.



## Supplemental Information

**Table S1: Cryo-EM Data collection, image processing, and refinement for membrane and  $\alpha$ -HL structures.**

| <u>Data Collection and Processing</u>                  | <u><math>\alpha</math>-HL 10:0 PC</u> | <u><math>\alpha</math>-HL 10:0/SM</u> | <u><math>\alpha</math>-HL Egg PC/Chol</u> | <u><math>\alpha</math>-HL Egg PC/SM</u> | <u><math>\alpha</math>-HL 12:0 PC</u> |
|--------------------------------------------------------|---------------------------------------|---------------------------------------|-------------------------------------------|-----------------------------------------|---------------------------------------|
| <u>Magnification</u>                                   | <u>54,000 X</u>                       | <u>54,000 X</u>                       | <u>54,000 X</u>                           | <u>54,000 X</u>                         | <u>54,000 X</u>                       |
| <u>Voltage</u>                                         | <u>200 kV</u>                         | <u>200 kV</u>                         | <u>200 kV</u>                             | <u>200 kV</u>                           | <u>200 kV</u>                         |
| <u>Electron exposure (e<sup>-</sup>/Å<sup>2</sup>)</u> | <u>50</u>                             | <u>50</u>                             | <u>50</u>                                 | <u>50</u>                               | <u>50</u>                             |
| <u>Defocus range (μm)</u>                              | <u>-1.25 to -2.75</u>                 | <u>-1.25 to -2.75</u>                 | <u>-1.25 to -2.75</u>                     | <u>-1.25 to -2.75</u>                   | <u>-1.25 to -2.75</u>                 |
| <u>Pixel size (Å)</u>                                  | <u>0.92</u>                           | <u>0.92</u>                           | <u>0.92</u>                               | <u>0.92</u>                             | <u>0.92</u>                           |
| <u>Symmetry Imposed</u>                                | <u>C7</u>                             | <u>C7</u>                             | <u>C7</u>                                 | <u>C7</u>                               | <u>C7</u>                             |
| <u>Number of micrographs</u>                           | <u>3825,</u>                          | <u>3291</u>                           | <u>3156</u>                               | <u>5248</u>                             | <u>4269</u>                           |
| <u>Number of particles</u>                             | <u>127106,</u><br><u>58308</u>        | <u>132548</u>                         | <u>52942</u>                              | <u>180700,</u><br><u>122024</u>         | <u>94339,</u><br><u>77187</u>         |
| <u>Map Resolution (Å)</u>                              | <u>2.8, 2.9</u>                       | <u>2.6</u>                            | <u>3</u>                                  | <u>2.8, 2.9</u>                         | <u>3.2, 3.2</u>                       |
| <u>FSC threshold</u>                                   | <u>0.143</u>                          | <u>0.143</u>                          | <u>0.143</u>                              | <u>0.143</u>                            | <u>0.143</u>                          |
| <u>Map Resolution Range</u>                            | <u>2.5-4</u>                          | <u>2-4</u>                            | <u>2.5-4</u>                              | <u>2.5-4</u>                            | <u>2.5-5</u>                          |

|                                |                          |                      |             |                          |                          |
|--------------------------------|--------------------------|----------------------|-------------|--------------------------|--------------------------|
|                                |                          |                      |             |                          |                          |
| <u>Heptameric conformation</u> | <u>Pore and Pre-pore</u> | <u>Late pre-pore</u> | <u>Pore</u> | <u>Pore and Pre-pore</u> | <u>Pore and Pre-pore</u> |

**Table S2:** Cryo-EM map and model validation for membrane and  $\alpha$ -HL structure.

| <u>Validation</u>           | <u>10:0 PC(Pore)</u> | <u>10:0 PC (Pre-pore)</u> | <u>10:0 PC/SM (Late pre-pore)</u> | <u>Egg PC (Pore)</u> |
|-----------------------------|----------------------|---------------------------|-----------------------------------|----------------------|
| <u>MolProbity Score</u>     | <u>2.05</u>          | <u>2.97</u>               | <u>1.7</u>                        | <u>1.63</u>          |
| <u>Clash Score</u>          | <u>16.96</u>         | <u>25.78</u>              | <u>5.98</u>                       | <u>5.75</u>          |
| <u>Rotamer Outliers (%)</u> | <u>2.48</u>          | <u>3.34</u>               | <u>0.40</u>                       | <u>0.50</u>          |
| <u>Ramachandran Plot</u>    |                      |                           | –                                 |                      |
| <u>Outlier (%)</u>          | <u>0.00</u>          | <u>0.12</u>               | <u>0.10</u>                       | <u>0.10</u>          |
| <u>Allowed (%)</u>          | <u>2.06</u>          | <u>15.70</u>              | <u>5.28</u>                       | <u>4.42</u>          |
| <u>Favored (%)</u>          | <u>97.94</u>         | <u>84.19</u>              | <u>94.62</u>                      | <u>95.48</u>         |

**Table S3:** Primer information.

| <b>Primer Name</b> | <b>Primer Sequence</b>                          |
|--------------------|-------------------------------------------------|
| <b>HL_4RES_FR</b>  | 5'-GGAATTCCATATGATTAATATCAAGACCGGCACCACC-3'     |
| <b>HL_9RES_FP</b>  | 5'-GGAATTCCATATGGCACCACCGATATTGGCAG-3'          |
| <b>HL_TER_RP</b>   | 5'-CCGCATATGATTGGTCATTTCTCTTTTCCCC-3'           |
| <b>HL_278C_FP</b>  | 5'-GATAAATGGACCGATCGTTGTAGCGAACGTTATAAAATTG-3'  |
| <b>HL_278C_RP</b>  | 5'-CAATTTTATAACGTTTCGCTACAACGATCGGTCCATTTATC-3' |
| <b>HL_179W_FP</b>  | 5'-GGTTAACCAGAACTGGGGTCCGTATGATCG-3'            |
| <b>HL_179W_RP</b>  | 5'-CGATCATACGGACCCAGTTCTGGTTAACC-3'             |
| <b>HL_200R_FP</b>  | 5'-GCTGTTTATGAAAACCCGTAATGGCAGTATGAAAGC-3'      |
| <b>HL_200R_RP</b>  | 5'-GCTTTCATACTGCCATTACGGGTTTTTCATAAACAGC-3'     |

**Table S4:** Reagent and source information.

| REAGENT                                              | SOURCE                       | IDENTIFIER          |
|------------------------------------------------------|------------------------------|---------------------|
| <b>Bacterial and virus strains</b>                   |                              |                     |
| <i>Escherichia coli</i> BL21(DE3)                    | Novagen                      | Cat# 69450-3CN      |
| <b>Chemicals, peptides, and recombinant proteins</b> |                              |                     |
| Tris Base                                            | HiMedia                      | Cat# TC072M         |
| Sodium Chloride                                      | Qualigens                    | Cat# Q15918         |
| Potassium Chloride                                   | Merck                        | Cat# P3911          |
| Potassium di-hydrogen orthophosphate                 | Qualigens                    | Cat# Q19465         |
| Di-sodium hydrogen orthophosphate                    | SD Fine Chemicals            | Cat# S40158 K05     |
| Luria Broth                                          | HiMedia                      | Cat# M575           |
| Isopropyl $\beta$ -D-1-thiogalactopyranoside         | Merck                        | Cat# I6758          |
| Imidazole                                            | Sigma Aldrich                | Cat# 792527-500G    |
| 2-Methyl-2,4-pentanediol                             | Sigma Aldrich                | Cat# 8208190100     |
| L- $\alpha$ -phosphatidylcholine (Egg, Chicken)      | Avanti Polar Lipids          | Cat# 840051P-200mg  |
| Cholesterol                                          | Merck Millipore              | Cat# C8997-5G       |
| Ni-NTA Agarose                                       | Qiagen                       | Cat# 30210          |
| Coomassie Brilliant blue R 250                       | Merck                        | Cat# 1.12553        |
| Precision Plus Protein™ Dual Color Standards         | Bio-Rad                      | Cat# #1610374       |
| Amicon Ultra-4 Centrifugal filter unit (10K)         | Merck                        | Cat# UFC801024      |
| PC Membranes 0.2 $\mu$ m                             | Avanti Polar Lipids          | Cat# 610006-1EA     |
| 10mm Filter Supports                                 | Avanti Polar Lipids          | Cat# 610014-1EA     |
| Extruder Set with Holder/Heating Block               | Avanti Polar Lipids          | Cat# 610000-1EA     |
| Syringe (1000 $\mu$ L)                               | Avanti Polar Lipids          | Cat# 610017-1EA     |
| DSPE-PEG (2000) Biotin                               | Avanti Polar Lipids          | Cat#880129P-10mg    |
| Brain SM                                             | Avanti Polar Lipids          | Cat#860062P-25mg    |
| 10:0 PC                                              | Avanti Polar Lipids          | Cat#853025P-25mg    |
| 14:0 PC (DMPC)                                       | Avanti Polar Lipids          | Cat#850345C-500mg   |
| 16:0 PC (DPPC)                                       | Avanti Polar Lipids          | Cat#850355C-500mg   |
| 18:1( $\Delta$ 9-Cis) PC (DOPC)                      | Avanti Polar Lipids          | Cat#850375P-1g      |
| Rhodamine B                                          | Sigma-Aldrich                | Cat#83689-1G        |
| Nile-Red                                             | Sigma-Aldrich                | Cat#72485-100MG     |
| 4ME 16:0 NBD PE (NBD-DPhPE)                          | Avanti Polar Lipids          | Cat#810142C-1mg     |
| Streptavidin                                         |                              |                     |
| Egg Liss Rhod PE                                     | Avanti Polar Lipids          | Cat#810146C-5mg     |
| Egg PC                                               | Avanti Polar Lipids          | Cat#131601P-5g      |
| Uranyl Acetate 98%, ACS Reagent                      | Polysciences, Inc            | Cat# 21447-25       |
| Superdex 200 Increase 10/300 GL                      | Cytiva                       | Cat# GE28-9909-44   |
| EM grid (Carbon film 300 mesh, Copper)               | Electron Microscopy Sciences | Cat# CF300-CU       |
| EM grid (Quantifoil R 1.2/1.3 300 Mesh, Copper)      | Electron Microscopy Sciences | Cat# Q3100CR1.3     |
| Quantifoil R 1.2/1.3, UT, 300 Mesh, Copper           | Electron Microscopy Sciences | Cat# Q3100CR1.3-2nm |
| 4',6-diamidino-2-phenylindole                        | Thermofisher Scientific      | Cat#D1306           |
| Atto 647N Maleimide                                  | Sigma Aldrich                | Cat#05316           |
| Streptavidin                                         | Sisco Research Laboratories  | Cat#87610           |
